## **Neurite outgrowth deficits caused by rare PLXNB1 variant identified in induced pluripotent stem cell-derived neurons from individual with pediatric bipolar disorder**

Guang Yang<sup>1,3</sup>, Ethan Parker<sup>4</sup>, Bushra Gorski<sup>6</sup>, Mark Libowitz<sup>1</sup>, Colin Maguire<sup>2</sup>, Jace B. King<sup>5</sup>, Hilary Coon<sup>5,6</sup>, Melissa Lopez-Larson<sup>5</sup>, Jeffrey Anderson<sup>5</sup>, Mark Yandell<sup>6</sup>, Alex Shcheglovitov<sup>1,3,4,5</sup>

<sup>1</sup>Department of Neurobiology, University of Utah, Salt Lake City, UT, USA

<sup>2</sup>Stem Cell Facility, Center for Clinical & Translational Science, Salt Lake City, UT, USA

<sup>3</sup>Neuroscience Graduate Program, University of Utah, Salt Lake City, UT, USA

<sup>4</sup>Department of Biomedical Engineering, University of Utah, Salt Lake City, UT, USA

<sup>5</sup>Department of Adult Psychiatry, University of Utah, Salt Lake City, UT, USA

<sup>6</sup>Department of Human Genetics, University of Utah, Salt Lake City, UT, USA

Correspondence:

Alex Shcheglovitov,

Department of Neurobiology

University of Utah School of Medicine

Salt Lake City, UT, 84112

[alexsh@neuro.utah.edu](mailto:alexsh@neuro.utah.edu)

T: 801-581-5606

Classification: Biological Sciences, Neuroscience

## Abstract:

Pediatric Bipolar Disorder (PBD) is a severe mood dysregulation condition experienced by 0.5–1% of children and teens in the United States. It is associated with recurrent episodes of psychosis and depression and an increased risk of suicidality. However, the genetics and neuropathology of PBD are largely unknown. Here, we used a combinatorial family-based approach to characterize the cellular, molecular, genetic, and network-level deficits associated with PBD. We recruited a PBD patient and three unaffected family members from a family with a history of psychiatric illnesses. Using resting-state functional magnetic resonance imaging (rs-fMRI), we detected altered resting state functional connectivity in the patient as compared to the unaffected sibling. Using transcriptomic profiling of patient and control induced pluripotent stem cell (iPSC) derived telencephalic organoids, we found aberrant signaling in the molecular pathways related to neurite outgrowth. We corroborated the presence of neurite outgrowth deficits in patient iPSC-derived cortical neurons and identified a rare homozygous loss-of-function *PLXNB1* variant (c.1360C>C; p.Ser454Arg) in the patient. Expression of wildtype but not *PLXNB1* variant rescued neurite outgrowth deficit in patient neurons. These results suggest that functional *PLXNB1* is an important regulator of neurite development in cortical neurons and that dysregulation of *PLXNB1*-mediated signaling cascades may contribute to an increased risk of PBD and other mood dysregulation-related disorders by disrupting neurite outgrowth and brain connectivity. Overall, the study demonstrates how a family-based combinatorial approach can be used to identify and study rare variants in psychiatric disorders to gain novel insights into molecular and cellular abnormalities.

## **Significance Statement:**

Psychiatric illnesses touch the lives of all living human beings. Yet, our understanding of the fundamental biological mechanisms of these illnesses is limited. An important question is how genetic polymorphisms in psychiatric disorders link up with abnormalities at the cellular and neural circuitry level, in individual patients. We propose a novel approach that is capable of identifying genetic, cellular, and neural circuit-level deficits in patients with psychiatric illnesses. We applied this approach and uncovered a homozygous PLXNB1 variant that causes neurite outgrowth deficits in a patient with pediatric bipolar disorder. We also identified functional connectivity differences in this patient compared to the unaffected sibling. This combinatorial approach could advance our understanding of the genetic and biological mechanisms in psychiatric disorders.

## **Introduction**

Bipolar disorder (BD) is a severe psychiatric illness that affects ~1-2% of the world population(1, 2). The hallmark symptoms of bipolar disorder are episodes of clinical mania and depression. However, many symptoms that patients experience are nonspecific and overlap with other psychiatric illnesses, including schizophrenia, major depressive disorder, and attention deficit hyperactivity disorder (3, 4). Concordantly, there exists a significant overlap in the genetic risk factors that underlie bipolar disorder and other psychiatric illnesses, such as major depressive disorder and schizophrenia (5–7). Pediatric bipolar disorder (PBD) is an early on-set BD diagnosed before age 18. It is estimated to affect 0.5–1% of children and teens in the United States but is highly underdiagnosed due to substantial overlap with the diagnoses of other mood dysregulation disorders (8, 9). PBD has been associated with increased risks for suicidal behavior, substance abuse, problems with authority, and hospitalizations.

Despite the tremendous socioeconomic burden of BD and PBD, the underlying pathology and genetics of these disorders remain largely unknown. This is partly due to the lack of animal models that recapitulate the complex symptom profile of patients (10). Neuroimaging studies in patients with BD and PBD have identified abnormalities in cortical and subcortical neural circuits involved with emotional processing and cognitive control (11–13); however, it is unknown how the detected circuit-level abnormalities may reflect underlying changes in the brain at the cellular and molecular levels. Induced pluripotent stem cell-derived neurons from BD patients and healthy individuals have been used to study the cellular and molecular deficits that are disrupted in association with BD (14). It has been demonstrated that BD is associated with reduced proliferation of neural progenitor cells, impaired neuronal differentiation (15, 16), impaired cell adhesion (17), and neuronal hyperexcitability (18, 19), which could be modulated by lithium responsiveness (17–19). However, despite the progress in uncovering the cellular deficits associated with BD, the genetic underpinnings of the cellular deficits have not been determined, and it is unknown whether patients recruited for iPSC-based studies also show abnormalities in neural circuitry.

BD is one of the most heritable psychiatric disorders (20), with an estimated heritability of 60–85% (21, 22). Genome-wide association studies (GWAS) have been used to identify common variants associated with BD (23–27). These studies have uncovered hundreds to thousands of common low-risk variants that may each contribute a small amount of risk for bipolar disorder, including variants in genes encoding calcium and potassium channels, neurotransmitters, cell-adhesion proteins, and other proteins that regulate neuronal functions and excitability. This information has been used to examine the developmental stages associated with these disorders (28), and efforts are underway to integrate GWAS variants with expression quantitative trait loci data to identify candidate causal variants for neuropsychiatric disorders (29). However, the impacts of GWAS variants on the cellular and molecular

properties are difficult to study due to small effect sizes that are unlikely to yield measurable cellular and molecular phenotypes.

In addition to common variants, damaging rare and de novo variants have also been identified in association with BD (25, 26, 30, 31); Unlike common variants of low effect sizes, rare variants conferring relatively larger genetic risk are particularly suitable for investigation with iPSC-based models as they can be pinpointed to specific genes and are amenable to genetic modeling (21). Indeed, rare, high-impact gene-coding and structural variants have been discovered to contribute causally to brain-related pathology in patients with psychiatric illnesses (32–34) and may also contribute to the severity of psychiatric illness (35). Understanding how damaging rare or de novo variants could contribute to cellular phenotypes in iPSC-derived neurons may provide a window into the pathophysiology of bipolar disorder and other major psychiatric disorders.

In the present study, we have developed a novel approach to identify and functionally interrogate rare mutations in patients with severe psychiatric disorders. We recruited and characterized a family that included an individual with PBD. We performed resting-state functional magnetic resonance imaging (rs-fMRI) and identified functional connectivity differences between the patient and the sex-matched unaffected sibling consistent with the results of our previous study on a larger cohort of individuals with PBD (36). We generated iPSCs and iPSC-derived neurons and organoids from all family members and found that patient iPSC-derived neurons exhibited reduced neurites as compared to control neurons. Finally, we identified a rare loss-of-function homozygous mutation in *PLXNB1* in patient cells that was responsible for the neurite outgrowth deficits. Collectively, these results suggest that loss-of-function mutations in *PLXNB1*, which lead to impaired neurite outgrowth, can contribute to disrupted resting-state functional connectivity and PBD risk.

## Results

We ascertained an individual with PBD in a Utah family with multiple individuals affected by common psychiatric illnesses, including bipolar disorder, anxiety, and depression (Fig 1A), suggesting a potential contribution of genetic factors to the psychiatric disorders in this family. To study the biological basis of PBD, we recruited a quartet from this family consisting of an unaffected father, unaffected mother, unaffected male sibling, and male diagnosed with PBD at age 12. The patient and unaffected sibling were both adolescents at the time of recruitment. Participants under the age of 18 underwent a clinical and diagnostic semi-structured interview by a board-certified child psychiatrist (MLL). The Child Behavioral Checklist (37) was assessed for the patient and unaffected sibling. (Supplementary Table 1) The patient scored within the clinical range for the category “CBCL Internalizing Problems. Both individuals scored within the normal range for “CBCL Externalizing Problems” and displayed normal IQ (Supplementary Table 1) (38).

We previously demonstrated that PBD is associated with abnormal functional connectivity between the default mode network (DMN) and salience network (SN) using rs-fMRI (36). To investigate the differences in the resting-state functional connectivity between the patient and unaffected sibling, we performed multiple high resolution (3600 volumes per brain) long-duration (44 minutes) rs-fMRI scans (Fig. 1B-D). This is approximately twice the duration typically required to identify individual connectomes reliably and reproducibly from a group (39, 40). The imaged volumes were parcellated into 25 regions of interest (ROI) and six functional networks representing the canonical brain networks (Fig 1B) (41, 42). Notably, the largest functional connectivity differences were observed in DMN-SN, specifically between the left medial prefrontal cortex and the bilateral insula connectivity (Fig 1B-C). We also parcellated the brain into 6923 ROIs (39) and plotted the number of connections showing increased connectivity for the bipolar sibling (thresholded at 1 standard deviation across connections). This analysis revealed higher global connectivity (and decreased negative connections) in the patient brain as

compared to the brain of the unaffected sibling, with the effect most consistent in the bilateral anterior insula of the salience network (Fig 1C-D). These results are consistent with the results of our previous study that negative functional resting-state brain connectivity is disrupted in DMN-SN circuitry in individuals with PBD (36). Other MRI studies on individuals with bipolar disorder observed similar connectivity deficits (43–45).

To gain insights into the cellular and molecular deficits that could be associated with disrupted brain connectivity in the PBD individual, we generated induced pluripotent stem cell (iPSCs) (Supplementary Fig. 1) and iPSC-derived telencephalic organoids from the quartet of recruited individuals (Fig. 2). Patient and control telencephalic organoids were produced from iPSC-derived single neural rosettes (SNR; Fig 2A-B(46)). We previously demonstrated that 1-month-old SNR-derived organoids consist of telencephalic neural progenitors and cortical excitatory and lateral ganglionic eminence-derived inhibitory neurons (46). To identify the differentially expressed genes (DEGs) and overrepresented pathways in patient organoids, we performed bulk RNA sequencing on twelve organoids obtained from each member of the quartet (three organoids per individual) and pair-wise comparisons using Gene Set Enrichment Analysis (GSEA) on all DEGs (Supplementary Fig. 3,4) (47). We categorized the top 15 up-and down-regulated Gene Ontology (GO) gene sets according to normalized enrichment score for patient vs. unaffected sibling (Fig 2C) and patient vs. mother, father, and all controls combined (Supplemental Fig 4). The enrichment analysis revealed that patient organoids showed significant enrichment in GO pathways related to neurite development, axon guidance, and synapse assembly, including “intermediate filament-based process”, “positive regulation of synapse assembly”, “neuron projection extension involved in neuron projection guidance”, “regulation of axon guidance”, “inhibitory synapse assembly”, as compared to control organoids (Fig 2C and Supplemental Fig 4).

One possible explanation for these transcriptomic differences could be due to differences in the developmental age and/or cellular composition between patient and control organoids. To assess the developmental age of patient and control organoids, we calculated the Pearson correlation coefficient between each organoid and human cortical transcriptome at multiple developmental time points from the BrainSpan dataset (48). The gene expression profiles in both patient and control SNR-derived organoids correlated the strongest with the transcriptome of early embryonic stages 9-24pcw of the fetal brain and did not appear to differentiate patient and unaffected family organoids (Fig 2D). This suggests that patient and control organoids model early fetal developmental stages and that patient organoids do not show apparently accelerated or delayed developmental maturation as compared to the controls.

To examine the relative proportion of progenitor cells, excitatory, and inhibitory neurons, we performed Cell Population Mapping (49) of bulk RNA sequencing data based on single-cell RNA sequencing gene expression profiles obtained in our previous study on 1-month-old SNR-derived organoids (Fig. 2E). This analysis confirmed that there are no significant differences in the relative proportions of neural progenitors, excitatory neurons, or inhibitory neurons between patient and control SNR-derived organoids. We corroborated these results by examining the expression levels of multiple cell-type-specific markers, including those that are expressed in pallial (PAX6, EMX2, LHX2, NEUROG, EOMES) and subpallial (GSX2, SOX6, ASCL1, DLX1, DLX2, NKX2.1, LHX6, OLIG2, NR2F2, HTR2A) neural progenitors (NES, SOX2, MKI67, VIM, GLI3, PROM1, HOPX, PTPRZ1, LIFR, MOXD1), as well as excitatory (SLC17A6, TBR1, BCL11B, SATB2) and inhibitory (GAD1, GAD2, SLC32A1) neurons (DCX, STMN2, SCN2A, GRIN2B) (Fig 2F). We found no apparent differences in the expression levels of these cell-type-specific markers compared to unaffected organoids. Together, these results indicate that patient and control organoids model similar early developmental stages and consist of similar types of cells, but may have deficits related to neurite development, axon guidance, or synapse assembly.



To investigate neurite development in patient and control neurons, we generated telencephalic iPSC-derived neurons from 3 patient and control iPSC lines (Fig. 3). To characterize the identities of differentiated cells from patient and control iPSCs, we performed immunostainings with antibodies against a proliferation marker Ki67 (Fig. 3A), deep layer cortical marker TBR1 (Fig. 3B), superficial layer cortical marker SATB2 (Fig. 3C), and inhibitory neuron marker GAD67 (Fig. 3D). Consistent with the bulk RNA-seq results obtained on organoids, we observed similar proportions of different cell types among control and patient iPSC-derived cells. We also observed that the majority (60-75%) of differentiated neurons were characterized by TBR1 expression, suggesting deep layer cortical identity. We next investigated the total neurite length in 1-month old patient and control neurons that were replated at low-density, 48 hours post-replating (Fig 3E-H). Interestingly, we discovered that patient iPSC-derived neurons demonstrated significantly reduced neurites as compared to control neurons, suggesting that impaired neurite outgrowth detected in patient neurons could be the earliest cellular endophenotype associated with disrupted gene expression networks detected in patient organoids and functional brain connectivity deficits observed in the patient brain.

### **Rare variant identification and prioritization**

Given the highly familial expression of severe neuropsychiatric illnesses in this family and the known contributing roles of rare and ultra-rare variants in neuropsychiatric disease risk (26, 50, 51), we next sought to explore whether the patient may harbor rare genetic variants that may contribute to the neurite outgrowth phenotypes detected in patient iPSC-derived neurons. We performed whole-exome sequencing on the quartet and rare variant discovery and prioritization using the pVAASST/Phevor pipeline (52–55) (Fig 4A and Supplementary Dataset 1). QC analysis confirmed the quality of the sequencing data, sex and familial relationship of the sequenced quartet, and their likely European origin (Supplemental Fig 4). Using pVAASST, we identified 44 rare variants under the recessive and 0 variants under the *de novo* model of inheritance (pVAASST CLRT<sub>p</sub><0.05) (Supplementary Dataset 1). We next used

Phevor to re-rank the list of 44 recessive variants based on known relevance to Human Phenotype Ontology terms related to Bipolar Disorder (Behavioral abnormality HP:0000708; Abnormal emotion/affect behavior HP:0100851; Bipolar affective disorder HP:0007302) (Supplementary Dataset 2-4). We then used Polyphen (56) to identify variants that are damaging with allele frequency less than 0.05 (equivalent to 5%). This analysis yielded 15 hits, including *TRIOBP*, *MN1*, *NBPF26*, *PLXNB1*, *ANGPTL8*, *DOCK6*, *SPDYE5*, and *CEP164* (Supplementary Dataset 5).

Of all identified variants, a homozygous variant in *PLXNB1* (3-48463799-T-G, c.1360A>C, pSer454Arg; AF=0.01322) (Fig 4B) was particularly interesting because it consistently scored in the top 6 for all Phevor rankings (Supplementary Dataset 2-4), and *PLXNB1* is an important regulator of axonal pathfinding, neurite outgrowth, and inhibitory synapse formation (57–63). In addition, a different variant in *PLXNB1* has been previously detected in a large Utah family with suicide (64), which is an extreme outcome associated with pediatric bipolar disorder (65). We also found enrichment of this *PLXNB1* variant in a large cohort of patients who died by suicide (Supplementary Dataset 6). *PLXNB1* resides in the 3p21 loci, which is highly associated with psychiatric disease risk (66), and it has two known co-receptors ErbB2 and Met (67), which were previously implicated in risk for bipolar disorder and autism in large-scale genome-wide or exome-wide association studies (24, 68, 69).

*PLXNB1* is a member of the plexin family of axon pathfinding proteins that act as high-affinity and high-specificity receptors for semaphorins (70, 71). PlexinB1 (*PLXNB1*) is the receptor for Semaphorin 4D (*SEMA4D*) (71). Interestingly, the homozygous variant Ser454Arg identified in patient *PLXNB1* resides in the SEMA domain of PlexinB1 (Fig 4C-D), which is critical for SEMA4D binding (71). To investigate the functional effect of this variant on *PLXNB1* function, we utilized a previously well-established cell collapse assay using COS-7 cells (72, 73). We transfected wild-type (WT) or mutant (MUT) *PLXNB1*-T2A-EGFP plasmids into COS-7 cells and investigated morphological changes in response to a transient treatment (30 mins) with 2nM SEMA4D or vehicle (Fig 4E-G). We observed that WT-

PLXNB1-expressing cells demonstrated the expected collapsed phenotypes in approximately 70% of cells upon SEMA4D treatment; however, no morphological changes were detected in MUT-PLXNB1-expressing cells, as compared to those treated with vehicle (Fig 4F). As we found no differences in the expression levels of *PLXNB1* or *SEMA4D* in control and patient organoids using bulk RNA sequencing data (Supplementary Fig 6), these results indicate that the Ser454Arg variant in *PLXNB1* is a loss-of-function mutation that impairs *PLXNB1* function mediated by SEMA4D. As PlexinB2 can also bind to SemA4D with intermediate affinity, we also examined the expression of *PLXNB2* in patient and control organoids, and found no significant differences, suggesting that *PLXNB2* expression does not compensate for the *PLXNB1* loss-of-function mutation.

To test *PLXNB1* function in patient iPSC-derived neurons, we treated both unaffected sibling and patient neurons with SEMA4D (8nM for 1 hour) and investigated the proportions of collapsed growth cones. Consistent with the results obtained on COS-7 cells, control neurites treated with SEMA4D demonstrated a significantly increased proportion of collapsed growth cones as compared to control neurites treated with vehicle (Fig. 4I). However, no differences in the proportion of collapsed growth cones were detected in patient neurites treated with SEMA4D and vehicle (Fig 4I). Together, these results suggest that the homozygous Ser454Arg mutation in *PLXNB1* identified in the patient with PBD is a loss-of-function mutation that may contribute to impaired neurite outgrowth.

### **Ser454Arg mutation in PLXNB1 causes neurite outgrowth deficits in human and rodent neurons**

Multiple signaling cascades have been implicated in regulating neurite outgrowth and complexity in mammalian neurons (74, 75). To determine whether Ser454Arg mutation in *PLXNB1* is the causative mutation for neurite outgrowth deficits detected in patient neurons, we performed rescue experiments by expressing WT-*PLXNB1* in patient iPSC-derived neurons and the phenocopy experiments

by expressing MUT- or WT-PLXNB1 in mouse cortical neurons obtained from *PLXNB1* knock out (*PlxnB1*<sup>-/-</sup>) mice (Friedel 2005)) (Fig. 5).

As all unaffected family members recruited to this study are heterozygous for Ser454Arg in *PLXNB1*, we reasoned that the expression of WT-PLXNB1 in patient iPSC-derived neurons should rescue or compensate the neurite outgrowth deficits if it is causally related. We electroporated patient and control iPSC-derived neurons with either WT- or MUT-PLXNB1 and investigated neurite outgrowth in electroporated neurons 48 hours post-electroporation (Fig 5A). Remarkably, the total neurite length in patient neurons expressing WT-PLXNB1 was similar to the total length of neurites in control neurons expressing WT-PLXNB1 (Fig 5B-C); however, it was significantly longer than the total length of neurites in patient neurons expressing MUT-PLXNB1 (Fig 5B-C). These results indicate that Ser454Arg is a loss of function mutation and homozygous Ser454Arg mutation in *PLXNB1* is necessary for neurite outgrowth deficits detected in patient neurons.

Given that the rescue experiments were performed on human iPSC-derived neurons obtained from a single family with similar genetic background, it is conceivable that the observed neurite outgrowth deficits and the rescue are dependent on the genetic background. To test whether Ser454Arg mutation in *PLXNB1* is sufficient to cause neurite outgrowth deficits in a genetic background independent manner, we expressed WT- or MUT-PLXNB1 in cortical neurons obtained from P0 *PlxnB1*<sup>-/-</sup> mice (Fig. 5D). We found that the total neurite length of MUT-PLXNB1-expressing neurons is significantly shorter than that in WT-PLXNB1-expressing neurons (Fig. 5E-F). These results suggest that homozygous Ser454Arg mutation in *PLXNB1* is sufficient to cause neurite outgrowth deficits in mammalian neurons and that *PLXNB1* is an important regulator of neurite development in mammalian neurons.

## Discussion

Bipolar Disorder is among the most common severe psychiatric illnesses in the world, yet the cellular and molecular deficits pertaining to this disease remain poorly understood. To gain insight into the circuit-level disruptions associated with BD, researchers have primarily taken the approach of using functional neuroimaging techniques such as fMRI. These studies have linked BD diagnoses with disrupted cortico-limbic connectivity (76, 77). Postmortem studies have implicated neuroinflammation as a potential risk factor for BD(78). Genome-wide association studies have identified ~64 significant loci associated with BD, including genes linked to ion channel and neurotransmitter receptor functions (24). Although informative on a population level, these studies have not yet produced clinically beneficial results for individual BD patients. Studies using iPSC-based models generated from BD patients have uncovered cellular deficits related to various aspects of neurodevelopment including neuronal proliferation, differentiation, cell adhesion, and neuronal excitability (15–19). However, it is unclear whether these patients also possess abnormal neural circuitry or harbor causative high-impact genetic variants.

In this study, we bridge these research designs, presenting a new combinatorial approach that leverages family-based recruitment, rs-fMRI, whole-exome sequencing, and human iPSC-derived neurons for studying the cellular and molecular deficits in patients with psychiatric illnesses. Using this approach, we identified that a rare mutation in *PLXNB1* caused neurite outgrowth deficits in iPSC-derived neurons from a patient with PBD and disrupted brain connectivity. We believe that this approach holds tremendous potential for identifying causal rare variants in PBD and other psychiatric disorders and elucidating the cellular and molecular deficits.

Using bulk RNA-sequencing, we observed upregulation of genes related to neurite development and synapse formation in patient-derived telencephalic organoids compared to unaffected sibling. This

finding is in contrast to the previous observation of decreased expression in genes involved with synapses and neuron projection. (79) Furthermore, this finding is surprising given our observation that patient-derived neurons show neurite outgrowth deficits *in vitro*. One possible explanation is that the transcriptomic changes in patient-derived organoids reflect the upregulation of compensatory mechanisms for impaired neurite outgrowth caused by the *PLXNB1* mutation.

This is the first study to use an iPSC-based approach to model PBD, and the first study to observe neurite outgrowth phenotypes in a patient with PBD. The association between impaired neurite outgrowth and bipolar disorder is not surprising, given that bipolar disorder treatments, such as lithium, valproate, lamotrigine, and quetiapine, are known to target pathways that regulate neurite development and axonogenesis (80, 81). In addition, neurite outgrowth deficits were previously implicated in BD and other neuropsychiatric disorders, including schizophrenia (82), autism spectrum disorder (83), and ADHD (84). Thus, impaired neurite outgrowth may be an early intermediate phenotype that could contribute to nonspecific risk for psychiatric disease. Interestingly, most of the neurons generated from 2D culture were identified as *Tbr1*-expressing deep-layer projection cortical neurons, which are known to migrate and shape the developing cortex (85). It is conceivable that impaired neurite outgrowth in these early-born neurons may disrupt cortical development and affect brain connectivity *in vivo*, as the ability of neurons to reach their synaptic targets is crucial for synaptogenesis and network formation (86). However, this finding does not necessarily suggest that impaired neurite outgrowth directly causes bipolar disorder or disrupted brain circuitry in this patient. As neurite outgrowth deficits have been implicated in other neuropsychiatric disorders, this finding supports the hypothesis that neurite outgrowth abnormalities may broadly be associated with underlying risk for neuropsychiatric pathologies. Although it is unknown whether this phenotype is present in the brain, the robust observation of these deficits *in vitro* could represent an early

endophenotype for drug screening for the development of novel therapies potentially important across multiple psychiatric diagnoses.

To our knowledge, this is also the first study to identify a rare genetic variant in *PLXNB1* in a patient with PBD. Interestingly, the *PLXNB1* co-receptor ErbB2 was previously identified as a BD risk gene (23), indicating a possible involvement of PLXNB1-ErbB2 signaling in BD risk. We demonstrated that *PLXNB1* Ser454Arg is a loss-of-function variant and that the homozygous *PLXNB1* Ser454Arg variant causes neurite outgrowth deficits. This finding is surprising, given that Sema4D-PlexinB1 signaling is known to cause acute growth cone collapse and reduced neurite outgrowth in mouse neurons. (87, 88) However, prolonged Sema4D stimulation of PlexinB1 receptors can also induce secondary neurite branching and outgrowth. (89) Thus, the exact effects of PlexinB1 on neurite outgrowth are complex and context dependent. Although the molecular mechanisms that are responsible for this neurite outgrowth phenotype remain unknown, one hypothesis is that *PLXNB1* Ser454Arg impairs Sema4D-PlexinB1 binding and affects the *PLXNB1*-mediated downstream signaling cascades, including R-Ras and Rho-dependent pathways (58, 90). Additionally, it is conceivable that the Ser454Arg mutation, which resides in the sema domain, impairs PlexinB1 binding affinity and specificity to Sema4D, causing inappropriate engagement of other ligands or constitutive activation. Intriguingly, deletion of the extracellular region of PlexinB1 causes impaired neurite outgrowth through an R-Ras-dependent mechanism (58). Furthermore, R-Ras signaling inhibits the PI3K/Akt/GSK3 $\beta$ /CRMP2 pathway, which is a target of lithium, and abnormal CRMP2 was previously identified in post-mortem tissue and iPSC-derived neurons of BD patients. (81) Intriguingly, lithium treatment also disrupts semaphorin signaling. (81) Taken together, this suggests that GSK3 $\beta$ /CRMP2 may be a convergent biological pathway affected in BD. Indeed, the high-confidence BD risk gene *ANK3* also regulates neuronal microtubule dynamics through CRMP2. (91) Future studies will be required to elucidate how the *PLXNB1* Ser454Arg variant caused neurite outgrowth deficits and whether downstream GSK3 $\beta$ /CRMP2 is affected. Further, although *PLXNB1* is

known to regulate growth cone and neurite morphology *in vitro* (58, 88), mutant mice lacking PlexinB1 are relatively normal with no major cytoarchitectural abnormalities or migration deficits (92), suggesting that major defects in PlexinB1 function *in vitro* likely result in subtle or hard-to-detect *in vivo* phenotypes. Furthermore, *PLXNB1* is known to regulate GABAergic synapse formation (59, 60). It is unclear whether *PLXNB1*-related neurite outgrowth deficit or *PLXNB1*-mediated synaptic deficits contribute to disrupted connectivity in bipolar disorder. Additional studies will be required to clarify these questions.

In summary, we present in this study a new paradigm to gain mechanistic insight into patients with psychiatric illnesses, leveraging functional magnetic resonance imaging, genetic sequencing, and rare variant identification, RNA sequencing, and iPSC-based approaches. We demonstrate the utility of this approach in a quartet with a patient diagnosed with pediatric bipolar disorder and discovered a rare mutation in *PLXNB1* that impaired neurite outgrowth. One limitation of this approach, however, is the generalizability of findings to the larger patient population—a limitation that is inherent to studies with small numbers of patients. Thus, future studies using this approach should recruit larger families comprising multiple patients and unaffected relatives. We believe that this approach holds tremendous potential for helping discover and elucidate the relationship between novel rare variants and their biological function, and generate hypotheses as to how this can lead to disrupted molecular/cellular pathways and affect brain connectivity.

## **Methods**

### **Study Participants**

The Institutional Review Board at the University of Utah approved this study. The family participating in this study was recruited via clinical referral. All subjects provided written informed consent prior to study participation. The patient and the unaffected sibling underwent clinical and



diagnostic interviews by a board-certified psychiatrist (MLL) using the Mini-international Neuropsychiatric Interview (93). The patient received a diagnosis of bipolar disorder at age 12. The Child Behavioral Checklist (CBCL) (37), which is a parent-report assessment that measures behavioral and emotional problems related to psychopathology in children, was completed by the participant's mother. The full-scale intelligence quotient was assessed using the Wechsler Abbreviated Scale of Intelligence (38).

### **Functional magnetic resonance imaging**

Images were acquired on a Siemens 3T Prisma scanner using a 64-channel head coil. The scanning protocol consisted of an MP2RAGE acquisition for an anatomic template (TR=5000 ms, TE=2.93 ms,  $T_{11}$ =700 ms,  $T_{12}$ =2030 ms, flip angle<sub>1</sub>=4°, flip angle<sub>2</sub>=5°, field of view=256 mm, 176 slices, resolution=1 x 1 x 1 mm, sagittal acquisition) and three ~15 minute resting state acquisitions using multiband BOLD echo-planar images (each scan contained 1220 volumes, TR = 730 s, TE = 33.2 ms, multiband factor=8, 2x2x2 mm resolution). During resting state scanning, subjects were instructed to "Keep your eyes open and remain awake and try to let thoughts pass through your mind without focusing on any particular mental activity."

Despiking (94) was performed using AFNI software package (95) (3dDespike) for initial correction of head motion displacement. Motion correction (realign), coregistration to MP2RAGE, segmentation of MP2RAGE, and normalization of MP2RAGE and BOLD to MNI template was performed in SPM12b (Wellcome Trust, London) for MATLAB (Mathworks, Natick MA). Phase-shifted soft tissue correction (PSTCor) (40) was used to regress physiological waveforms as well as regressors obtained from subject motion parameters, degraded white matter, degraded CSF, and soft tissues of the face and calvarium. No regression of the global signal was performed to avoid contamination of gray matter

sources (40, 96, 97). Censoring of frames showing greater than 0.2 mm (motion scrubbing) was performed as a final step prior to analysis with concatenation of remaining frames (98).

Differences in connectivity were obtained for the largest 25 clusters from the Yeo et al. brain parcellation as previously described (41, 99) with connectivity difference represented by the functional connectivity of the bipolar sibling – control sibling. Differences in functional connectivity between the siblings are displayed below for each pair of 25 cortical brain regions.

The histogram of functional connectivity in the pediatric bipolar and healthy sibling in Fig 1D was generated by parcellating the brain to 6923x6923 regions of interest covering cortical and subcortical gray matter. Functional connectivity values for each unique pair of connections was generated (39, 100) and plotted.

### **Whole Exome Sequencing**

DNA samples were extracted using the Perkinelmer Chemagic 360 DNA extraction kit and subjected to whole exome sequencing (WES). The four samples with Kindred ID BP-Fam01 were sequenced at University of Utah HCI Core and 125 Cycle Paired-End WES was performed on the Illumina HiSeq 2000 (University of Utah).

### **Alignment and Variant Calling**

Alignment and variant calling were performed by the Utah Center for Genetic Discovery (UCGD) core services. Fastq files from paired-end sequencing were aligned to the human reference build GRCh38 using BWA-MEM (Burrows-Wheeler Aligner). Variants were called through the UCGD pipeline using the

Sentieon software package (<https://www.sentieon.com>) (101). SAMBLASTER was used to mark duplicate reads and de-duplicate aligned BAM files. The following algorithms from the Sentieon software package3 Realigner and Qual Cal were utilized for INDEL realignment, base recalibration to produce polished BAM files. Polished BAM file was processed using the Sentieon's Haplotyper algorithm to produce gVCF files (102). Sample gVCF files were combined and jointly genotyped with 287 unrelated Utah samples from the 1000 Genomes Project (CEU) samples to produce a multi-sample VCF file.

### **Quality Control**

We applied several quality control algorithms to the Fastq files, BAM files and VCF files (Ewels 2016). Read quality, read duplication rate, presence of adapter and overrepresented sequences in Fastq files were extracted from the Fastp files (103). We estimated depth and coverage of aligned sequence data from BAM indexes using IndexCov (104). Sample qualities in final VCF were evaluated using Peddy (105) to determine and confirm sex, relatedness, heterozygosity of each individual to identify any potential sample quality issues.

### **Identification of damaging variants**

A Pedigree Variant Annotation, Analysis, and Search Tool (pVAAST), version 2.2.0, (54) was performed on four individual samples (cases) and 2492 background controls from the 1000 Genomes Project to test for association between genetic burden and phenotype. pVAAST scores variants based on their functional variant prediction and evidence of co-segregation among affected family members. Analysis excluded low-quality variants with statistically significant departure from Hardy-Weinberg equilibrium ( $P < .0001$ ) or with missing genotype rates greater than 10.0% among background genomes. Genes were

then ranked according to an empirical p-value determined by running a permutation test against a set of background control samples and counting the number of controls that have a genotype at least as damaging as that observed in the affected family members. pVAAST was run with  $1 \times 10^4$  permutations against the 2492 background genomes from the 1000 Genomes Project. Additional re-ranking of pVAAST outputs occurred using Phenotype Driven Variant Ontological Re-ranking tool (PHEVOR) (55) which uses Human Phenotype Ontology (HPO) terms and connections to Gene Ontology (GO) terms to re-prioritize potentially damaging alleles. We used the following HPO terms: Bipolar affective disorder HP:0007302, Behavioral abnormality HP:0000708, Abnormal emotion/affect behavior HP:0100851.

### **Bulk RNA Sequencing and Analysis**

Total RNA was purified using the RNeasy Micro Kit (Qiagen) with DNase I digestion. RNA was purified from three organoids from each family member (Patient, unaffected sibling, mother, father). Libraries were prepared using the NEBNext Ultra II Directional RNA Library Prep Kit with rRNA depletion and verified using the Bioanalyzer RNA Nano Assay (Agilent) before sequencing on the NovaSeq 6000 (Illumina) with paired-end 150b reads. Optical duplicates were removed with Clumpify v38.34. Adapter sequences were trimmed with Cutadapt and reads were aligned to the reference genome (GRCh38) using STAR version 2.7.3a. Features were counted using FeatureCounts version 1.6.3. DESeq2 was used to perform differential expression analysis. Gene set enrichment analysis (GSEA) was performed using the GSEA 4.1.0 GSEAPreranked tool (47) with default parameters against the following Gene Ontology dataset domains: GO Biological Processes, GO Molecular Functions, GO Cellular Component. Ranked gene lists used for the GSEA analysis was generated using the write\_gsea\_rnk function from the hciR R package (<https://github.com/HuntsmanCancerInstitute/hciR>) for the following contrasts: patient vs. unaffected sibling, patient vs. mother, patient vs. father, and patient vs. all controls pooled.

For the BrainSpan transcriptome correlational analysis, we combined normalized gene expression data from all patient and control SNR-derived organoids with BrainSpan dataset (<http://www.brainspan.org>) consisting of 309 samples from 27 different donors ranging from 8pcw to 1 year. Spearman's correlation coefficient was calculated between each organoid sample and each BrainSpan sample for dorsolateral prefrontal cortex, anterior (rostral) cingulate (medial prefrontal) cortex, and ventrolateral prefrontal cortex average gene expression.

Bulk RNA sequencing deconvolution analysis was performed using the Cell Population Mapping algorithm (49) with default parameters. Relative abundance of neural progenitor cells, excitatory neurons, and inhibitory neurons were inferred from Bulk RNA sequencing data from all patient and control 1-month old SNR-derived organoids using single-cell RNA sequencing data from 1-month old SNR-derived organoids (46).

## **Immunostaining**

For all immunostaining experiments, cells were first washed with 1x PBS then fixed with 4% paraformaldehyde for 15 minutes at room temperature. Cells were then washed 3x with PBS-Glycine . Then, cells were permeabilized with 0.3% Triton X-100 and blocked for 1 hour with 3% BSA. Cells were then incubated with primary antibody diluted in 3% BSA for either 1 hour at room temperature or overnight at 4C. Cells were then washed 3 times with PBS, then incubated with secondary antibodies. Coverslips were then mounted on glass slides using VectaShield (Vectorlabs). The following antibodies were used: Ms  $\alpha$  TuJ1 (1:1000, BioLegend/Covance MMS-435P), Ch  $\alpha$  MAP2 (1:1000, Novus Biologicals NB300-213), Ch  $\alpha$  GFP (1:1000, Novus Biologicals NB100-1614), Ms  $\alpha$  PlexinB1 (1:500 Santa Cruz Biotechnology sc-28372), Rat  $\alpha$  Ki67 (1:1000, Thermo Scientific 14-5698-82), Rb  $\alpha$  Tbr1 (1:1000, Abcam ab31940), Ms  $\alpha$  Satb2 (1:1000, Abcam ab51502), Rat  $\alpha$  Ctip2 (1:1000, Abcam ab18465), Ms  $\alpha$  GAD67

(1:1000 EMD Millipore MAB5406), Phalloidin-488 (1:1000, AAT Bioquest 23153), Rb  $\alpha$  Synapsin 1/2 (1:200, Synaptic Systems 106 003), Gp  $\alpha$  Gephyrin (1:200 Synaptic Systems 147 003), Ms  $\alpha$  PSD95 (1:100, Abcam ab2723).

### **iPSC Generation and Characterization**

Blood samples were obtained from all four family members (father, mother, unaffected sibling, patient). Induced pluripotent stem cells (iPSCs) were generated from patient and control fibroblasts using the CytoTune-iPS 2.0 Sendai Reprogramming Kit. Characterization of iPSCs were performed using immunohistochemistry. iPSCs were stained and assessed for pluripotency markers Oct4, Sox2, Nanog, and Tra-1-60. (Supplementary Fig 1). Karyotyping of iPSCs from all family members was performed using the KaryoStat Assay (ThermoFisher) to assess for the presence of copy number variants. (Supplementary Fig 2).

### **iPSC Culture and Neural Differentiation**

Human pluripotent stem cell lines used in this study were maintained on Matrigel (1%, BD) in 1:1 ratio of Essential 8 Medium (Thermo Fisher Scientific) and StemFlex Medium (Thermo Fisher Scientific). For neural differentiation, cells were passaged at high density to reach ~90% confluency 2-3 days post-passaging. For induction, E8 medium was replaced with neural differentiation (ND) medium containing a 1:1 mixture of N2 medium (DMEM/F-12, 1% N2 Supplement [Cat#17502048], 1% MEM-NEAA, 2  $\mu$ g/ml Heparin, and 1% Pen/Strep) and B-27 medium (Neurobasal-A [Cat#10888022], 2% B27 Supplement with vitamin A [Cat#17504044], 1% GlutaMAX and 1% Pen/Strep) supplemented with SMAD inhibitors (4  $\mu$ M dorsomorphin and 10  $\mu$ M SB431542). ND medium was replaced daily for the next 7–10 days. On days 7-

10, cells were dissociated with dispase. Cell clumps were re-plated on Matrigel-coated plates in ND medium with EGF (10 ng/mL) and FGF (10 ng/mL). Approximately 50–100% of media was replenished daily for the next 3–6 days to remove dying cells. Neural rosette clusters appeared after ~6 days in EGF/FGF-containing media. Neural cells are expanded for an additional 1-2 weeks then dissociated into single cell suspension with Accutase (STEMCELL Technologies 07920) and plated on Matrigel-coated plates in 1:1 mixture of N-2 and B-27 medium. For experiments involving iPSC-derived neurons, neurons were dissociated with papain (20U/mL, Worthington) and plated on coverslips coated with Poly-L-Ornithine (100ug/mL, Sigma-Aldrich P3655-100MG) and Laminin (50ug/mL, Sigma-Aldrich L2020-1MG)

### **Generation of Organoids**

For generation of organoids used in bulk RNA sequencing, iPSCs were first cultured and induced into generate neural rosettes. Single neural rosettes (SNRs) were mechanically isolated from plates of neural rosettes using a sterile glass hook and re-plated on Matrigel-coated plates at low density. On days 15–19, SNRs were manually isolated and transferred to ultra-low attachment plates in ND medium with EGF (10 ng/mL) and FGF (10 ng/mL). Plates were kept on an orbital shaker (45 rpm) in a 37°C, 5% CO<sub>2</sub> incubator with 50% media exchange every other day to maintain the final concentrations of EGF and FGF at 10 ng/mL. Brightfield images of organoids were taken every 7 days. On day 30 post-induction, final images of organoids were taken and organoids that are visually similar in size and appearance were harvested for bulk RNA sequencing.

## **Neurite Outgrowth Assay**

Patient and control iPSC-derived neurons (1-month post-induction) were dissociated with papain and plated on 15mm coverslips coated with Poly-L-Ornithine (100ug/mL, Sigma-Aldrich P3655-100MG) and Laminin (50ug/mL, Sigma-Aldrich L2020-1MG) at a density of 70,000 cells/coverslips. Neurons were incubated in neuronal media (1:1 mixture of N-2 and B-27) for 48 hours. Cells were then fixed with 4% paraformaldehyde and stained for DAPI and TuJ1 for neurite length quantification. Images were obtained at 20x magnification using either the EVOS M5000 microscope or the Nikon A1R confocal microscope. Semi-automated neurite length quantification was performed using HcA-Vision (CSIRO).

## **Generation of PLXNB1 Plasmids**

A pCDNA3.1 vector containing full-length human PLXNB1 was obtained from Dr. Xuewu Zhang. T2A-EGFP was cloned into the pCDNA3.1-PLXNB1 plasmid to generate wild-type PLXNB1-T2A-EGFP plasmid. Patient-specific PLXNB1 1360 A>C point mutation was generated from the wild-type PLXNB1-T2A-EGFP plasmid using QuikChange Mult Site-Directed Mutagenesis Kit (Agilent Technologies). Confirmation of the point mutation was performed using PCR and Sanger Sequencing.

## **Growth Cone Collapse Assay**

iPSC-derived neurons (1-month post-induction) were dissociated with papain and plated on chamber slides coated with Poly-L-Ornithine and Laminin. 48 hours post-plating, neurons were treated with either vehicle control (PBS) or 8nM Sema4D for 1 hour. Cells were then fixed with 4% paraformaldehyde and stained with TuJ1, Phalloidin-488, and DAPI for growth cone evaluation. The percentage of neurites containing growth cones was quantified using ImageJ. All analyses were performed blind.

## **Functional Characterization of PLXNB1 Ser454Arg**



The Cos7 collapse assay was used to functionally characterize PLXNB1 Ser454Arg. COS7 cells were cultured in DMEM/F12 (Invitrogen) supplemented with 10% FBS and 1% Pen/Strep. On day 0, cells were replated onto tissue culture-treated 24-well plates at a concentration of 15,000 cells/well. On day 1, cells were co-transfected with 0.5ug mKate and 1ug of either wild-type PLXNB1-T2A-EGFP or PLXNB1-Ser454Arg-T2A-EGFP using Lipofectamine 3000 Transfection Reagent (Thermo Fisher Scientific L3000008). On day 3, cells were treated with 2nM Sema4D for 30 minutes, then fixed with 4% paraformaldehyde. Images of cell morphology were taken at 40x magnification using the EVOS M5000 microscope. Cells were categorized as “collapsed” or “non-collapsed” based on morphology of RFP+ signal.

### **Neurite Outgrowth Rescue in iPSC-derived neurons**

iPSC-derived neurons (14 days post-induction) from patient and unaffected sibling were dissociated with Accutase (STEMCELL Technologies 07920) and resuspended in neuronal medium (1:1 mixture of complete N-2 and B-27 medium). Dissociated cells were electroporated with either 5ug of wild-type PLXNB1-T2A-EGFP or PLXNB1-Ser454Arg-T2A-EGFP using the ECM 830 Square Wave Electroporation System (BTX) (340V, 900us, 1 pulse) and let rest at room temperature for 10 minutes. Cells were then transferred to poly-L-ornithine and laminin-coated coverslips at a density of 200,000 cells/well. 12 hours later, half the media was replaced with 1:1 mixture of N-2 and B-27 medium supplemented with 10nM BDNF(Novus Biologicals NBP1-99674-50ug) and 1% Pen/Strep. 48 hours later, cells were fixed with 4% paraformaldehyde and immunostained with antibodies against GFP and TuJ1. Images of neurons were taken at 20x magnification using the EVOS M5000 microscope. Neurite length quantifications were assessed using the ImageJ plugin NeuronJ (106).

### **Mouse experiments**

PlexinB1 +/- mice were generated as described by Friedel et al. 2005 and were received as a gift the Paradis lab at Brandeis University. Mating pairs between PlexinB1 +/- mice were set up to produce PlexinB1 -/- mice for all neuronal culture experiments. Cortical neurons were harvested at P0 and dissociated using papain (Worthington). Neurons were electroporated with the ECM 830 Square Wave Electroporation System (BTX) with either 5ug of wild-type PLXNB1-T2A-EGFP or mutant PLXNB1-T2A-EGFP plasmid, then plated onto poly-L-ornithine and laminin-coated 10mm coverslips at a density of 250,000 cells/coverslip. Cells were cultured in MEM (Gibco) supplemented with 10% FBS, 1M Glucose, 200mM GlutaMax (gibco), and 100mM pyruvic acid (sigma). 12 hours later, media was changed to Neurobasal A (Gibco) supplemented with B27, 1% Pen/Strep, 200mM GlutaMax, and 1M Glucose. 48 hours later, cells were fixed and immunostained. 48 hours later, cells were fixed with 4% paraformaldehyde and immunostained with antibodies against GFP and TuJ1. Images of neurons were taken at 20x magnification using the EVOS M5000 microscope. Neurite length quantifications were assessed using the ImageJ plugin NeuronJ (106).

## **Acknowledgements**

First and foremost, the authors thank the recruited subjects for making this study possible. The authors are thankful to Dr. Suzanne Paradis for sharing PLXNB1-null mice; to Dr. Xuewu Zhang for sharing the human PlexinB1 plasmid; to Drs. Megan Williams, Sungjin Park, Richard Dorsky, and Jan Christian for advice on experiments and comments on the manuscript; to Dr. Brian Dalley, Opal Allen, and Brian Lohman and Utah high-throughput genomics facility for help with sequencing and data analysis; to Utah cell imaging facility to help with imaging; to Dr. Elliott Farris for help with analysis of variant data; to Dr. Marvin B. Moore and the Center for High Performance Computing for help with processing and analysis of whole exome data. The authors would also like to thank the funding sources that made this study

possible: the Utah Neuroscience Initiative, the Utah Genome Project, and the NIH Developmental Biology Training Grant (Award Number: T32HD007491).

## References

1. P. Bebbington, R. Ramana, The epidemiology of bipolar affective disorder. *Social Psychiatry and Psychiatric Epidemiology* **30**, 279–292 (1995).
2. S. Pini, *et al.*, Prevalence and burden of bipolar disorders in European countries. *European Neuropsychopharmacology: The Journal of the European College of Neuropsychopharmacology* **15**, 425–434 (2005).
3. C. Z. Burton, *et al.*, Psychosis in Bipolar Disorder: Does It Represent a More ‘Severe’ Illness? *Bipolar Disord* **20**, 18–26 (2018).
4. M. J. Brus, M. v. Solanto, J. F. Goldberg, Adult ADHD vs. bipolar disorder in the DSM-5 era: a challenging differentiation for clinicians. *J Psychiatr Pract* **20**, 428–437 (2014).
5. T. G. Schulze, *et al.*, Molecular genetic overlap in bipolar disorder, schizophrenia, and major depressive disorder. *World J Biol Psychiatry* **15**, 200–208 (2014).
6. O. B. Smeland, *et al.*, Genome-wide analysis reveals extensive genetic overlap between schizophrenia, bipolar disorder, and intelligence. *Molecular Psychiatry* **25**, 844–853 (2020).
7. Bipolar Disorder and Schizophrenia Working Group of the Psychiatric Genomics Consortium, Genomic Dissection of Bipolar Disorder and Schizophrenia, Including 28 Subphenotypes. *Cell* **173**, 1705–1715.e16 (2018).
8. E. B. Weller, R. A. Weller, M. A. Fristad, Bipolar disorder in children: misdiagnosis, underdiagnosis, and future directions. *J Am Acad Child Adolesc Psychiatry* **34**, 709–714 (1995).
9. K. Renk, *et al.*, Bipolar Disorder in Children. *Psychiatry Journal* **2014**, 1–19 (2014).
10. D. K. E. Beyer, N. Freund, Animal models for bipolar disorder: from bedside to the cage. *International Journal of Bipolar Disorders* **5**, 35 (2017).
11. S. M. Strakowski, M. P. DelBello, C. M. Adler, The functional neuroanatomy of bipolar disorder: a review of neuroimaging findings. *Molecular Psychiatry* **10**, 105–116 (2005).
12. M. N. Pavuluri, M. M. O’Connor, E. M. Harral, J. A. Sweeney, An fMRI study of the interface between affective and cognitive neural circuitry in pediatric bipolar disorder. *Psychiatry Res* **162**, 244–255 (2008).
13. C. H. Chen, J. Suckling, B. R. Lennox, C. Ooi, E. T. Bullmore, A quantitative meta-analysis of fMRI studies in bipolar disorder. *Bipolar Disord* **13**, 1–15 (2011).
14. K. S. O’Shea, M. G. McInnis, Neurodevelopmental origins of bipolar disorder: iPSC models. *Molecular and Cellular Neurosciences* **73**, 63–83 (2016).
15. J. M. Madison, *et al.*, Characterization of Bipolar Disorder Patient-Specific Induced Pluripotent Stem Cells from a Family Reveals Neurodevelopmental and mRNA Expression Abnormalities. *Mol Psychiatry* **20**, 703–717 (2015).

16. S. Bavamian, *et al.*, Dysregulation of miR-34a Links Neuronal Development to Genetic Risk Factors for Bipolar Disorder. *Mol Psychiatry* **20**, 573–584 (2015).
17. J. L. Wang, *et al.*, Label-free, live optical imaging of reprogrammed bipolar disorder patient-derived cells reveals a functional correlate of lithium responsiveness. *Translational Psychiatry* **4**, e428–e428 (2014).
18. J. Mertens, *et al.*, Differential responses to lithium in hyperexcitable neurons from patients with bipolar disorder. *Nature* **527**, 95–99 (2015).
19. S. Stern, *et al.*, Neurons derived from patients with bipolar disorder divide into intrinsically different sub-populations of neurons, predicting the patients' responsiveness to lithium. *Mol Psychiatry* **23**, 1453–1465 (2018).
20. N. Craddock, P. Sklar, Genetics of bipolar disorder. *Lancet* **381**, 1654–1662 (2013).
21. P. F. Sullivan, D. H. Geschwind, Defining the Genetic, Genomic, Cellular, and Diagnostic Architectures of Psychiatric Disorders. *Cell* **177**, 162 (2019).
22. J. Song, *et al.*, Bipolar disorder and its relation to major psychiatric disorders: a family-based study in the Swedish population. *Bipolar Disord* **17**, 184–193 (2015).
23. L. Hou, *et al.*, Genome-wide association study of 40,000 individuals identifies two novel loci associated with bipolar disorder. *Human Molecular Genetics* **25**, 3383–3394 (2016).
24. N. Mullins, *et al.*, Genome-wide association study of more than 40,000 bipolar disorder cases provides new insights into the underlying biology. *Nature Genetics* **53**, 817–829 (2021).
25. J. H. Sul, *et al.*, Contribution of common and rare variants to bipolar disorder susceptibility in extended pedigrees from population isolates. *Translational Psychiatry* **10**, 1–10 (2020).
26. C. Toma, *et al.*, An examination of multiple classes of rare variants in extended families with bipolar disorder. *Translational Psychiatry* **8**, 1–12 (2018).
27. E. A. Stahl, *et al.*, Genome-wide association study identifies 30 loci associated with bipolar disorder. *Nat Genet* **51**, 793–803 (2019).
28. N. E. Clifton, *et al.*, Dynamic expression of genes associated with schizophrenia and bipolar disorder across development. *Translational Psychiatry* **9** (2019).
29. B. Zeng, *et al.*, Multi-ancestry eQTL meta-analysis of human brain identifies candidate causal variants for brain-related traits. *Nature Genetics* **54**, 161–169 (2022).
30. S. A. Ament, *et al.*, Rare variants in neuronal excitability genes influence risk for bipolar disorder. *Proceedings of the National Academy of Sciences* **112**, 3576–3581 (2015).
31. M. Kataoka, *et al.*, Exome sequencing for bipolar disorder points to roles of de novo loss-of-function and protein-altering mutations. *Molecular Psychiatry* **21**, 885–893 (2016).
32. P. F. Sullivan, M. J. Daly, M. O'Donovan, Genetic architectures of psychiatric disorders: the emerging picture and its implications. *Nature Reviews Genetics* **13**, 537–551 (2012).

33. A. Falk, *et al.*, Modeling psychiatric disorders: from genomic findings to cellular phenotypes. *Molecular Psychiatry* **21**, 1167–1179 (2016).
34. T. Ishii, *et al.*, In Vitro Modeling of the Bipolar Disorder and Schizophrenia Using Patient-Derived Induced Pluripotent Stem Cells with Copy Number Variations of PCDH15 and RELN. *eNeuro* **6**, ENEURO.0403-18.2019 (2019).
35. A. W. Zoghbi, *et al.*, High-impact rare genetic variants in severe schizophrenia. *Proceedings of the National Academy of Sciences* **118** (2021).
36. M. P. Lopez-Larson, *et al.*, Abnormal functional connectivity between default and salience networks in pediatric bipolar disorder. *Biol Psychiatry Cogn Neurosci Neuroimaging* **2**, 85–93 (2017).
37. T. M. Achenbach, L. A. Rescorla, *Manual for the ASEBA School-Age Forms & Profiles*. (2001).
38. D. Wechsler, Wechsler Abbreviated Scale of Intelligence. *The Psychological Corporation: Harcourt Brace & Company*. New York, NY. (1999).
39. L. M. Shah, J. A. Cramer, M. A. Ferguson, R. M. Birn, J. S. Anderson, Reliability and reproducibility of individual differences in functional connectivity acquired during task and resting state. *Brain and Behavior* **6**, e00456 (2016).
40. J. S. Anderson, M. A. Ferguson, M. Lopez-Larson, D. Yurgelun-Todd, Reproducibility of Single-Subject Functional Connectivity Measurements. *AJNR: American Journal of Neuroradiology* **32**, 548–555 (2011).
41. B. T. T. Yeo, *et al.*, The organization of the human cerebral cortex estimated by intrinsic functional connectivity. *Journal of Neurophysiology* **106**, 1125–1165 (2011).
42. D. H. Han, S. M. Kim, S. Bae, P. F. Renshaw, J. S. Anderson, Brain connectivity and psychiatric comorbidity in adolescents with Internet gaming disorder. *Addiction Biology* **22**, 802–812 (2017).
43. J. Gong, *et al.*, Disrupted functional connectivity within the default mode network and salience network in unmedicated bipolar II disorder. *Progress in Neuro-Psychopharmacology and Biological Psychiatry* **88**, 11–18 (2019).
44. A. M. Sobczak, *et al.*, Altered Functional Connectivity Differences in Salience Network as a Neuromarker of Suicide Risk in Euthymic Bipolar Disorder Patients. *Frontiers in Human Neuroscience* **14** (2020).
45. S. Rai, *et al.*, Default-mode and fronto-parietal network connectivity during rest distinguishes asymptomatic patients with bipolar disorder and major depressive disorder. *Translational Psychiatry* **11**, 1–8 (2021).
46. Y. Wang, *et al.*, “Modeling autism-associated SHANK3 deficiency using human cortico-striatal organoids generated from single neural rosettes” (2021).
47. A. Subramanian, *et al.*, Gene set enrichment analysis: A knowledge-based approach for interpreting genome-wide expression profiles. *Proceedings of the National Academy of Sciences* **102**, 15545–15550 (2005).

48. J. A. Miller, *et al.*, Transcriptional landscape of the prenatal human brain. *Nature* **508**, 199–206 (2014).
49. A. Frishberg, *et al.*, Cell composition analysis of bulk genomics using single-cell data. *Nature Methods* **16**, 327–332 (2019).
50. C. Toma, *et al.*, De Novo Gene Variants and Familial Bipolar Disorder. *JAMA Network Open* **3**, e203382 (2020).
51. G. Genovese, *et al.*, Increased burden of ultra-rare protein-altering variants among 4,877 individuals with schizophrenia. *Nature Neuroscience* **19**, 1433–1441 (2016).
52. A. F. Rope, *et al.*, Using VAAST to Identify an X-Linked Disorder Resulting in Lethality in Male Infants Due to N-Terminal Acetyltransferase Deficiency. *American Journal of Human Genetics* **89**, 28–43 (2011).
53. B. Kennedy, *et al.*, Using VAAST to Identify Disease-Associated Variants in Next-Generation Sequencing Data. *Current protocols in human genetics / editorial board, Jonathan L. Haines ... [et al.]* **81**, 6.14.1-6.14.25 (2014).
54. H. Hu, *et al.*, A unified test of linkage analysis and rare-variant association for analysis of pedigree sequence data. *Nat Biotechnol* **32**, 663–669 (2014).
55. M. V. Singleton, *et al.*, Phevor Combines Multiple Biomedical Ontologies for Accurate Identification of Disease-Causing Alleles in Single Individuals and Small Nuclear Families. *American Journal of Human Genetics* **94**, 599–610 (2014).
56. I. A. Adzhubei, *et al.*, A method and server for predicting damaging missense mutations. *Nature Methods* **7**, 248–249 (2010).
57. Y. Ito, I. Oinuma, H. Katoh, K. Kaibuchi, M. Negishi, Sema4D/plexin-B1 activates GSK-3 $\beta$  through R-Ras GAP activity, inducing growth cone collapse. *EMBO Reports* **7**, 704–709 (2006).
58. I. Oinuma, H. Katoh, M. Negishi, Molecular dissection of the semaphorin 4D receptor plexin-B1-stimulated R-Ras GTPase-activating protein activity and neurite remodeling in hippocampal neurons. *The Journal of Neuroscience: The Official Journal of the Society for Neuroscience* **24**, 11473–11480 (2004).
59. M. S. Kuzirian, A. R. Moore, E. K. Staudenmaier, R. H. Friedel, S. Paradis, The Class 4 Semaphorin Sema4D Promotes the Rapid Assembly of GABAergic Synapses in Rodent Hippocampus. *The Journal of Neuroscience* **33**, 8961–8973 (2013).
60. J. E. McDermott, D. Goldblatt, S. Paradis, Class 4 Semaphorins and Plexin-B receptors regulate GABAergic and glutamatergic synapse development in the mammalian hippocampus. *Molecular and Cellular Neurosciences* **92**, 50–66 (2018).
61. P. Vodrazka, *et al.*, The semaphorin 4D-plexin-B signaling complex regulates dendritic and axonal complexity in developing neurons via diverse pathways. *European Journal of Neuroscience* **30**, 1193–1208 (2009).

62. I. Oinuma, Y. Ito, H. Katoh, M. Negishi, Semaphorin 4D/Plexin-B1 Stimulates PTEN Activity through R-Ras GTPase-activating Protein Activity, Inducing Growth Cone Collapse in Hippocampal Neurons\*. *Journal of Biological Chemistry* **285**, 28200–28209 (2010).
63. S. Paradis, *et al.*, An RNAi-based Approach Identifies New Molecules Required for Glutamatergic and GABAergic Synapse Development. *Neuron* **53**, 217–232 (2007).
64. H. Coon, *et al.*, Genetic risk factors in two Utah pedigrees at high risk for suicide. *Translational Psychiatry* **3**, e325 (2013).
65. K. Aaltonen, *et al.*, Differences and similarities of risk factors for suicidal ideation and attempts among patients with depressive or bipolar disorders. *Journal of Affective Disorders* **193**, 318–330 (2016).
66. Z. Yang, *et al.*, The genome-wide risk alleles for psychiatric disorders at 3p21.1 show convergent effects on mRNA expression, cognitive function, and mushroom dendritic spine. *Molecular Psychiatry* **25**, 48–66 (2020).
67. J. M. Swiercz, T. Worzfeld, S. Offermanns, ErbB-2 and met reciprocally regulate cellular signaling via plexin-B1. *The Journal of Biological Chemistry* **283**, 1893–1901 (2008).
68. Y. Peng, *et al.*, The autism associated MET receptor tyrosine kinase engages early neuronal growth mechanism and controls glutamatergic circuits development in the forebrain. *Mol Psychiatry* **21**, 925–935 (2016).
69. L. Hou, *et al.*, Genome-wide association study of 40,000 individuals identifies two novel loci associated with bipolar disorder. *Human Molecular Genetics* **25**, 3383–3394 (2016).
70. K. Ohta, *et al.*, Plexin: A novel neuronal cell surface molecule that mediates cell adhesion via a homophilic binding mechanism in the presence of calcium ions. *Neuron* **14**, 1189–1199 (1995).
71. T. Worzfeld, S. Offermanns, Semaphorins and plexins as therapeutic targets. *Nature Reviews Drug Discovery* **13**, 603–621 (2014).
72. T. Takahashi, S. M. Strittmatter, PlexinA1 Autoinhibition by the Plexin Sema Domain. *Neuron* **29**, 429–439 (2001).
73. L. J. Turner, A. Hall, Plexin-induced collapse assay in COS cells. *Methods in Enzymology* **406**, 665–676 (2006).
74. M. L. Szpara, *et al.*, Analysis of gene expression during neurite outgrowth and regeneration. *BMC Neuroscience* **8**, 100 (2007).
75. K. Khodosevich, H. Monyer, Signaling involved in neurite outgrowth of postnatally born subventricular zone neurons in vitro. *BMC Neuroscience* **11**, 18 (2010).
76. B. Vai, C. Bertocchi, F. Benedetti, Cortico-limbic connectivity as a possible biomarker for bipolar disorder: where are we now? *Expert Rev Neurother* **19**, 159–172 (2019).



77. M. L. Phillips, H. A. Swartz, A critical appraisal of neuroimaging studies of bipolar disorder: toward a new conceptualization of underlying neural circuitry and roadmap for future research. *Am J Psychiatry* **171**, 829 (2014).
78. V. v. Giridharan, *et al.*, Postmortem evidence of brain inflammatory markers in bipolar disorder: a systematic review. *Molecular Psychiatry* **25**:1 **25**, 94–113 (2019).
79. A. Kathuria, *et al.*, Transcriptome analysis and functional characterization of cerebral organoids in bipolar disorder. *Genome Medicine* **12**, 1–16 (2020).
80. S. Kidnapillai, *et al.*, Drugs used to treat bipolar disorder act via microRNAs to regulate expression of genes involved in neurite outgrowth. *Journal of Psychopharmacology* **34**, 370–379 (2020).
81. B. T. D. Tobe, *et al.*, Probing the lithium-response pathway in hiPSCs implicates the phosphoregulatory set-point for a cytoskeletal modulator in bipolar pathogenesis. *Proc Natl Acad Sci U S A* **114**, E4462–E4471 (2017).
82. K. Brennand, *et al.*, Modeling schizophrenia using hiPSC neurons. *Nature* **473**, 221–225 (2011).
83. S. Prem, J. H. Millonig, E. DiCicco-Bloom, Dysregulation of Neurite Outgrowth and Cell Migration in Autism and Other Neurodevelopmental Disorders. *Advances in Neurobiology* **25**, 109–153 (2020).
84. M. Aebi, *et al.*, Gene-set and multivariate genome-wide association analysis of oppositional defiant behavior subtypes in attention-deficit/hyperactivity disorder. *American Journal of Medical Genetics. Part B, Neuropsychiatric Genetics: The Official Publication of the International Society of Psychiatric Genetics* **171**, 573–588 (2016).
85. R. F. Hevner, *et al.*, Tbr1 regulates differentiation of the preplate and layer 6. *Neuron* **29**, 353–366 (2001).
86. S. Batool, *et al.*, Synapse formation: from cellular and molecular mechanisms to neurodevelopmental and neurodegenerative disorders. *Journal of Neurophysiology* **121**, 1381–1397 (2019).
87. Y. Saito, I. Oinuma, S. Fujimoto, M. Negishi, Plexin-B1 is a GTPase activating protein for M-Ras, remodelling dendrite morphology. *EMBO Rep* **10**, 614–621 (2009).
88. J. M. Swiercz, R. Kuner, J. Behrens, S. Offermanns, Plexin-B1 directly interacts with PDZ-RhoGEF/LARG to regulate RhoA and growth cone morphology. *Neuron* **35**, 51–63 (2002).
89. P. Vodrazka, *et al.*, The semaphorin 4D-plexin-B signalling complex regulates dendritic and axonal complexity in developing neurons via diverse pathways. *The European Journal of Neuroscience* **30**, 1193–1208 (2009).
90. J. Aurandt, H. G. Vikis, J. S. Gutkind, N. Ahn, K.-L. Guan, The semaphorin receptor plexin-B1 signals through a direct interaction with the Rho-specific nucleotide exchange factor, LARG. *Proc Natl Acad Sci U S A* **99**, 12085–12090 (2002).
91. J. C. Garza, *et al.*, Disruption of the psychiatric risk gene Ankyrin 3 enhances microtubule dynamics through GSK3/CRMP2 signaling. *Translational Psychiatry* **8**, 135 (2018).

92. P. Fazzari, *et al.*, Plexin-B1 plays a redundant role during mouse development and in tumour angiogenesis. *BMC Developmental Biology* **7**, 55 (2007).
93. , The Mini-International Neuropsychiatric Interview (M.I.N.I.): the development and validation of a structured diagnostic psychiatric interview for DSM-IV and ICD-10 - PubMed (March 10, 2022).
94. H. J. Jo, *et al.*, Effective Preprocessing Procedures Virtually Eliminate Distance-Dependent Motion Artifacts in Resting State fMRI. *J Appl Math* **2013** (2013).
95. R. W. Cox, AFNI: software for analysis and visualization of functional magnetic resonance neuroimages. *Comput Biomed Res* **29**, 162–173 (1996).
96. Z. S. Saad, *et al.*, Trouble at rest: how correlation patterns and group differences become distorted after global signal regression. *Brain Connect* **2**, 25–32 (2012).
97. K. Murphy, R. M. Birn, D. A. Handwerker, T. B. Jones, P. A. Bandettini, The impact of global signal regression on resting state correlations: are anti-correlated networks introduced? *Neuroimage* **44**, 893–905 (2009).
98. J. D. Power, K. A. Barnes, A. Z. Snyder, B. L. Schlaggar, S. E. Petersen, Spurious but systematic correlations in functional connectivity MRI networks arise from subject motion. *Neuroimage* **59**, 2142 (2012).
99. D. H. Han, S. M. Kim, S. Bae, P. F. Renshaw, J. S. Anderson, Brain connectivity and psychiatric comorbidity in adolescents with Internet gaming disorder. *Addiction Biology* **22**, 802–812 (2017).
100. B. J. Curtis, P. G. Williams, C. R. Jones, J. S. Anderson, Sleep duration and resting fMRI functional connectivity: examination of short sleepers with and without perceived daytime dysfunction. *Brain and Behavior* **6** (2016).
101. D. Freed, R. Aldana, J. Weber, J. Edwards, “The Sentieon Genomics Tools - A fast and accurate solution to variant calling from next-generation sequence dat” (2017).
102. G. G. Faust, I. M. Hall, SAMBLASTER: fast duplicate marking and structural variant read extraction. *Bioinformatics* **30**, 2503–2505 (2014).
103. S. Chen, Y. Zhou, Y. Chen, J. Gu, fastp: an ultra-fast all-in-one FASTQ preprocessor. *Bioinformatics* **34**, i884–i890 (2018).
104. B. S. Pedersen, R. L. Collins, M. E. Talkowski, A. R. Quinlan, Indexcov: fast coverage quality control for whole-genome sequencing. *Gigascience* **6** (2017).
105. B. S. Pedersen, A. R. Quinlan, Who’s Who? Detecting and Resolving Sample Anomalies in Human DNA Sequencing Studies with Peddy. *American Journal of Human Genetics* **100**, 406–413 (2017).
106. E. Meijering, *et al.*, Design and validation of a tool for neurite tracing and analysis in fluorescence microscopy images. *Cytometry A* **58**, 167–176 (2004).

## Figure Legends

### **Figure 1. Recruited family with pediatric bipolar disorder show functional connectivity differences. A.**

Schematic of quartet recruited into the present study and extended pedigree. Quartet consists of patient diagnosed with pediatric bipolar disorder and unaffected mother, father, and sibling. Sex and sibling orders are randomized. Solid red circles indicate relatives with history of psychiatric symptoms or diagnosis, as reported through parental interview. Red box indicates individuals subjected to rs-fMRI analysis. B. Connectivity matrix depicting differences in connectivity between patient and unaffected sibling parcellated into previously described 25 clusters (Yeo et al. 2011). Differences in functional connectivity (patient – unaffected sibling) are displayed for each pair of 25 cortical brain regions. C. Heatmap depicting connectivity difference between unaffected sibling and patient. D. Histogram of functional connectivity values in between each unique connection of 6923 parcellated regions of interest for patient and unaffected sibling.

### **Figure 2. Bulk RNA sequencing and analysis of patient and control iPSC-derived organoids. A.**

Schematic for generation of iPSC-derived organoids. iPSC, induced pluripotent stem cell; FGF, fibroblast growth factor; EGF, epidermal growth factor. B. Representative images of early organoids used for bulk RNA sequencing at day 30. Scale bars, 500um. C. Gene Set Enrichment Analysis (GSEA) of top 15 most up- and down-regulated pathways for Gene Ontology gene set “GO: Biological Process” (FDR  $q < 0.05$ ). D. Heatmap depicting Pearson’s Correlation coefficients of patient and control organoids (3 per line) with BrainSpan transcriptome of cortical human tissue at different fetal development stages. E. Heatmap visualization of normalized gene expression of selected cell type-specific marker genes. Each row indicates the gene expression values for a single organoid. F. Quantification of relative cell type predictions between all patient organoids (n=3) and all pooled control organoids (n=9) using scBio.

**Figure 3. Characterization of iPSC-derived neurons.** A. Left: Quantification of the percentage of Ki67+ cells among all DAPI+ cells in patient and control neurons (n=3 patient iPSC lines, 3 iPSC lines from unaffected sibling, mother, and father /3 differentiations/55406 DAPI+ cells analyzed). Right: Representative images of neural rosettes immunostained with Ki67, MAP2, and DAPI. B. Left: Quantification of the percentage of Tbr1+ cells among all MAP2+ cells. (n=3 patient iPSC lines, 3 iPSC lines from unaffected sibling, mother, and father/3 differentiations/6498 MAP2+ cells analyzed). Right: Representative images of neurons stained with DAPI, MAP2, Tbr1. C. Left: Quantification of the percentage of Satb2+ cells among all MAP2+ cells (n=3 patient iPSC lines, 3 iPSC lines from unaffected sibling, mother, and father/3 differentiations/1154 MAP2+ cells analyzed). Right: Representative images of neurons stained with DAPI, MAP2, Satb2. D. Left: Quantification of the percentage of GAD67+ positive neurons among all DAPI+ cells. (n=3 patient iPSC lines, 3 iPSC lines from unaffected sibling, mother, and father/3 differentiations/6498 DAPI+ cells analyzed) Right: Representative images of cells stained with DAPI, MAP2, and GAD67. Scale bars = 100um (A-D). Data presented as mean  $\pm$  s.e.m. n.s. Unpaired t test. E. Representative images of patient and control iPSC-derived neurons immunostained for DAPI, MAP2, and TUJ1. F. Representative neurite tracings for quantification of primary neurite length. Scale bars = 100um (E-F). G. Cumulative frequency distribution of normalized neurite length measurements in patient and control neurons (n=11,023 neurons/4 lines/differentiations from patient and sibling, 3 line/differentiations from mother, 3 lines/differentiations from father) \*\*\*\*P<0.0001 Kolmogorov-Smirnov test. H. Bar graph depicting neurite length measurements (normalized to average control values) in patient and pooled control neurons. Small gray dots represent normalized individual neurite measurements (n=50 randomly selected measurements per experiment for visualization), larger circles represent average neurite length measurements across independent experiments (n=11,023 neurons/4 lines/differentiations from patient and sibling, 3 line/differentiation from mother, 3 lines/differentiations from father). \*\*P<0.01 Unpaired t test. All data presented as mean  $\pm$  s.e.m.

**Figure 4. Patient harbors homozygous PLXNB1 1360A>C (Ser454Arg) variant.** A. Schematic depicting pipeline for rare variant discovery in recruited family. Whole exome sequencing was performed on proband with pediatric bipolar disorder (PBD), unaffected mother, father, and sibling. Rare variant discovery was performed using pVAASST, and variant prioritization was performed on the list of pVAASST hits ( $CLRT_p < 0.05$ ) using Phevor, using the HPO terms: Behavioral abnormality (HP:0000708); Abnormal emotion/affect behavior (HP:0100851); Bipolar affective disorder (HP:0007302). Functional validation was then performed to follow-up on candidate variants of interest. B. Sanger sequencing confirms homozygous PLXNB1 1360A>C in PBD patient and heterozygous 1360 A>C in unaffected family members, as indicated by the black arrow. C. Cartoon showing the gene product of PLXNB1. PLXNB1 1360A>C (Ser454Arg) is located in the extracellular SEMA domain of PlexinB1. D. Cartoon depicting Ser454Arg variant location in the center of the beta-propeller structure of the SEMA domain of PLXNB1. E. Schematic depicting the Cos7 collapse assay. Cos7 cells were co-transfected with RFP control and either wild-type or mutant Ser454Arg PLXNB1-T2A-EGFP plasmid. 48 post-transfection, cells were treated with 2nM Sema4D for 30 minutes. GFP+ RFP+ Cos7 cells were assessed to determine the effect of Sema4D treatment on cell morphology. F. Representative images of Cos7 cells treated with wild-type or mutant Ser454Arg PLXNB1-T2A-EGFP, treated with either 2nM IgG control or 2nM Sema4D. White arrows depict GFP+ RFP+ cells that were assayed for morphological “collapse”. Scalebar = 100um. G. Quantification of the percentage of cells showing “collapsed” morphology under wild-type or mutant Sema4D conditions, treated with IgG control or Sema4D. (n=3 independent experiments/821 GFP+/RFP+ cells) \*\*\*P<0.001 unpaired t test. H. Representative images of neurons used for growth cone collapse analysis exhibiting “non-collapsed” and “collapsed” growth cone phenotypes, stained with TUJ1, Phalloidin, and DAPI. Scale bars = 50um (top), 8um (bottom). I. Quantification of percentage growth cone collapse in patient and control neurites treated with Vehicle (PBS) or 8nM Sema4D (n=5

independent experiments/3 iPSC lines from patient and unaffected sibling/1,251 neurites). Lines denote results from the same experiment. \*\*\*P<0.001 Paired t-test.

**Figure 5. Homozygous PLXNB1 Ser454Arg causes neurite outgrowth deficits.** A. Schematic of PLXNB1 rescue experiment in iPSC-derived neurons. Patient and unaffected sibling (control) iPSCs underwent induction and directed differentiation. Patient and control-derived neurons were dissociated into single-cell suspension and electroporated with wild-type or Ser454Arg mutant PLXNB1-T2A-EGFP plasmid, and plated on tissue culture treated plates coated with poly-ornithine and laminin. Neurite outgrowth was quantified 48 hours post-electroporation. B. Representative images of patient-derived neurons expressing GFP and TuJ1 48 hours post-electroporation. White arrows track cell soma and neurites. C. Quantification of neurite length (normalized to controls) in patient and control neurons electroporated with wild-type or Ser454Arg mutant PLXNB1-T2A-EGFP. Dots show individual neurite length measurements (n=501 neurons), circles represent averages from independent experiments (n=3-5 independent experiments, 3 iPSC from patient and unaffected sibling/3 differentiations) \*\*P<0.01, \*\*\*P<0.0001, unpaired t test. D. Schematic of PLXNB1 Ser454Arg phenocopy experiment. P0 PLXNB1-null mouse cortical tissue were harvested and dissociated into single-cell suspension. Cells were electroporated with either wild-type or Ser454Arg mutant PLXNB1-T2A-EGFP and plated on tissue culture treated plates coated with poly-ornithine and laminin. Neurite length of GFP+ neurons were quantified 48 hours post-electroporation. E. Representative images of GFP+/TuJ1+ PLXNB1-null mouse neurons electroporated with mutant or wild-type PLXNB1. F. Quantification of neurite length (normalized to KO+WT-PLXNB1) in PLXNB1-null mouse neurons electroporated with wild-type or mutant PLXNB1-T2A-EGFP. Dots represent neurite measurements (n=156 neurons), circles represent averages from independent experiments (n=4 independent experiments/2 electroporations per experiment per condition). Scalebars = 100um (B, E). Data presented as mean  $\pm$  s.e.m.

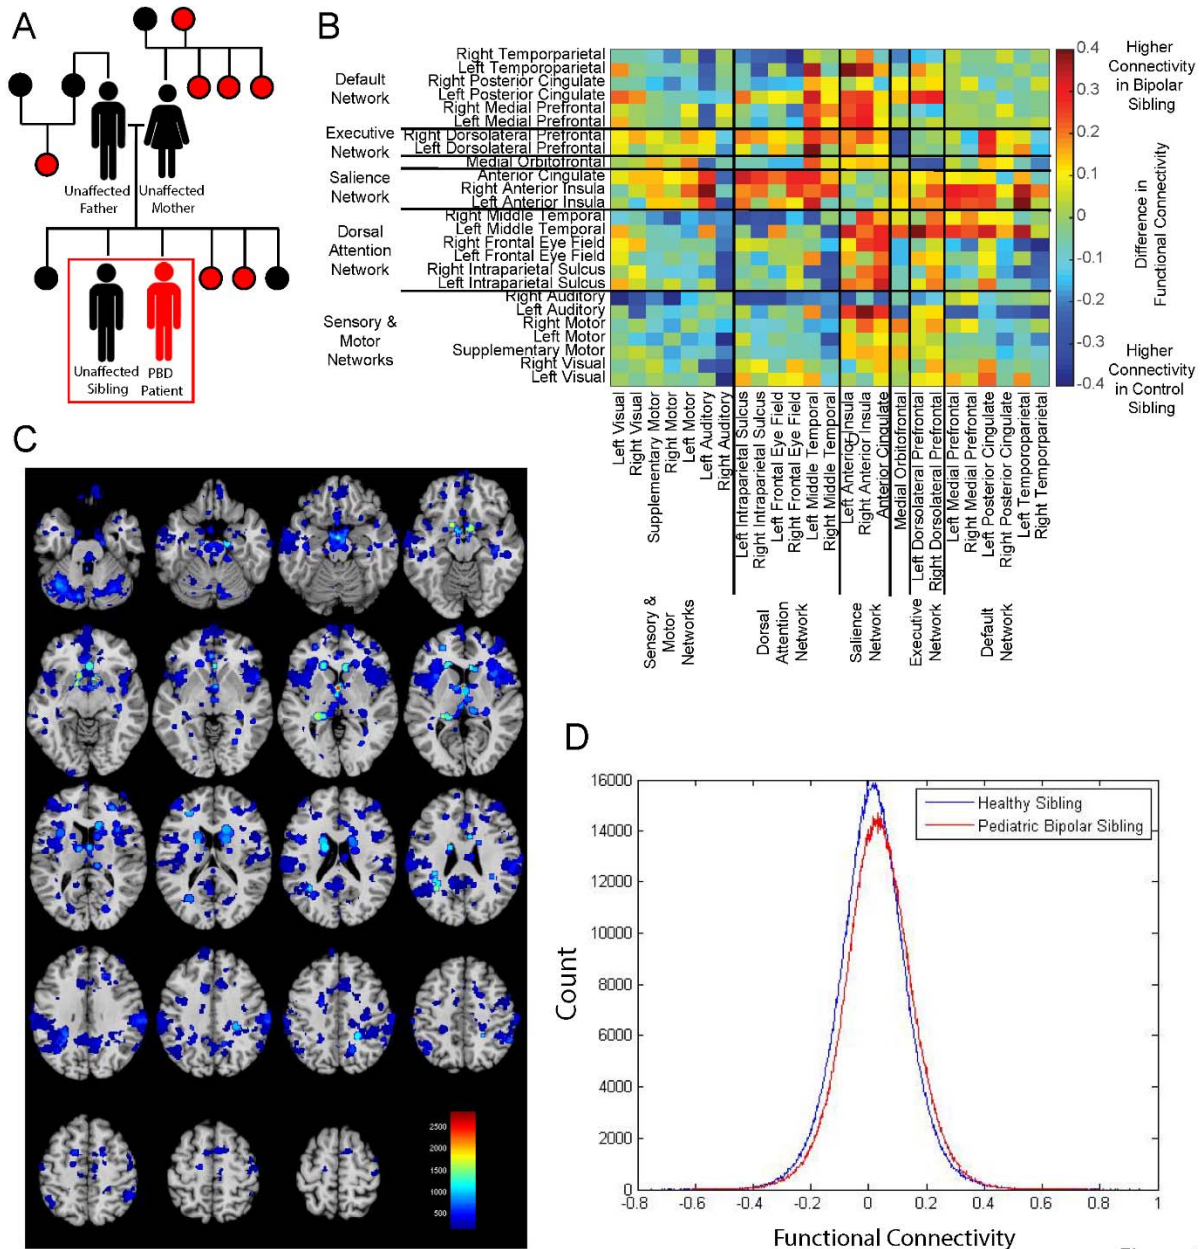

Figure 1

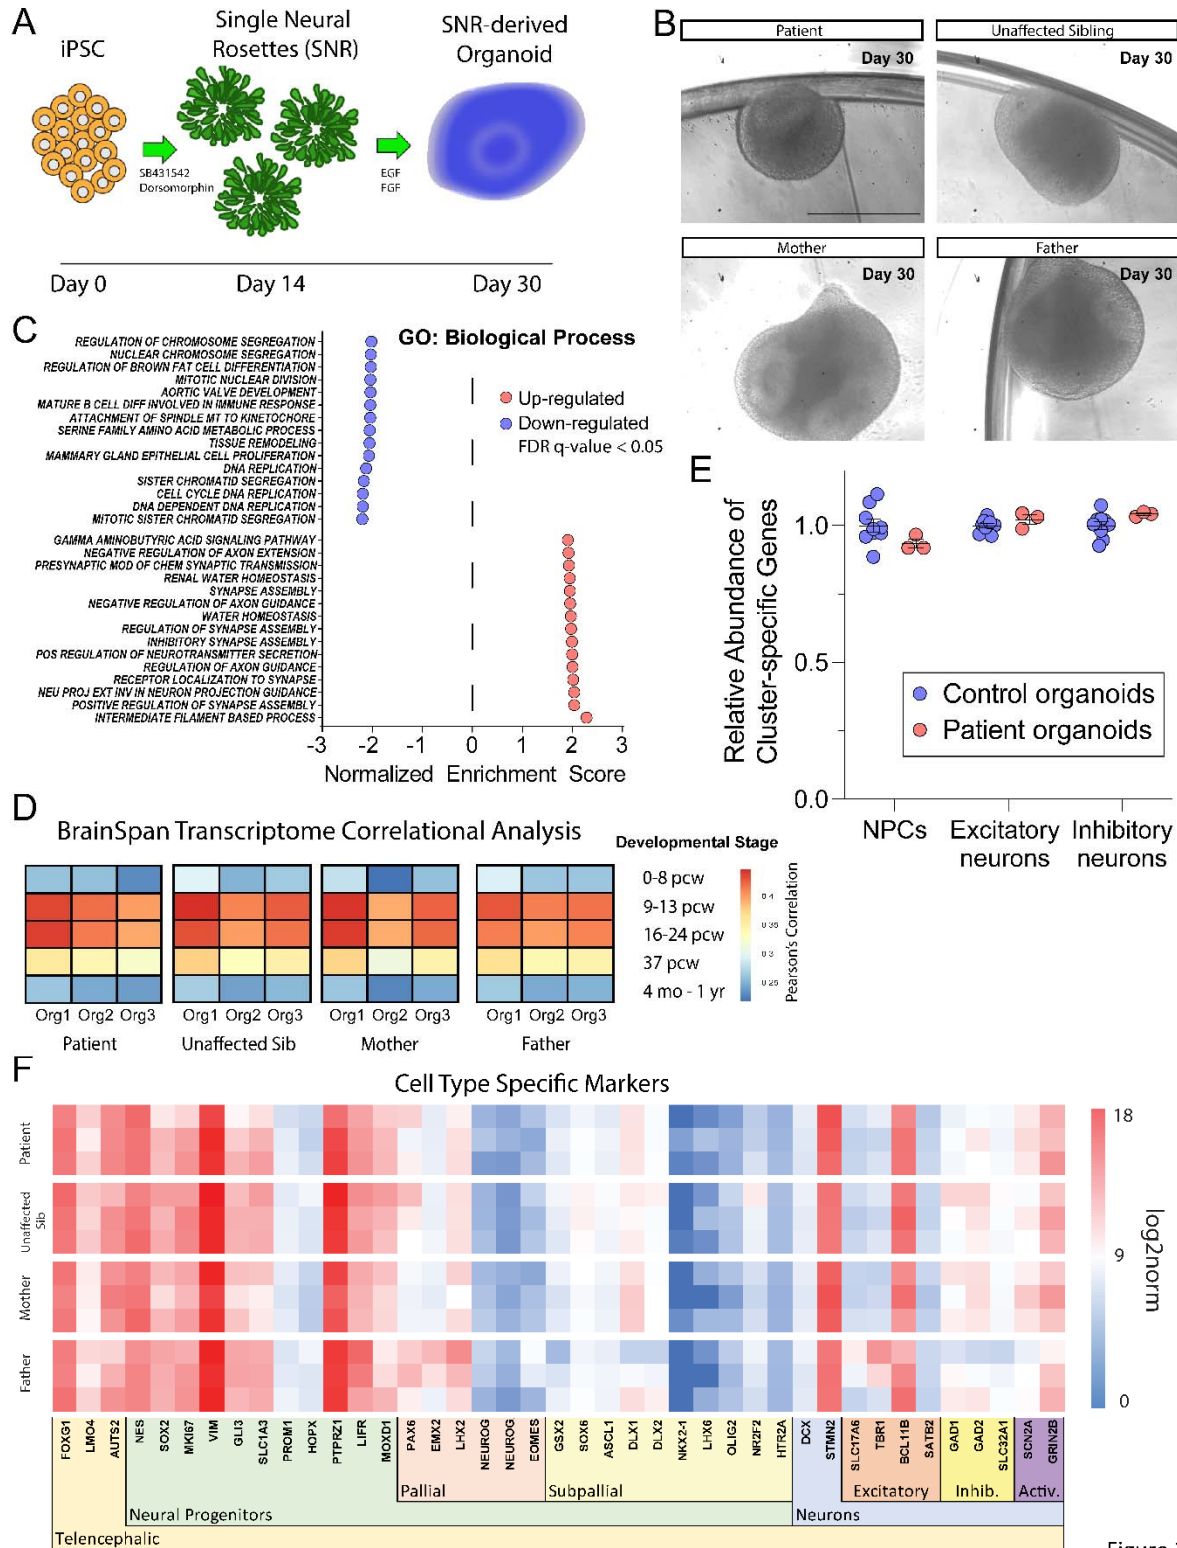

Figure 2



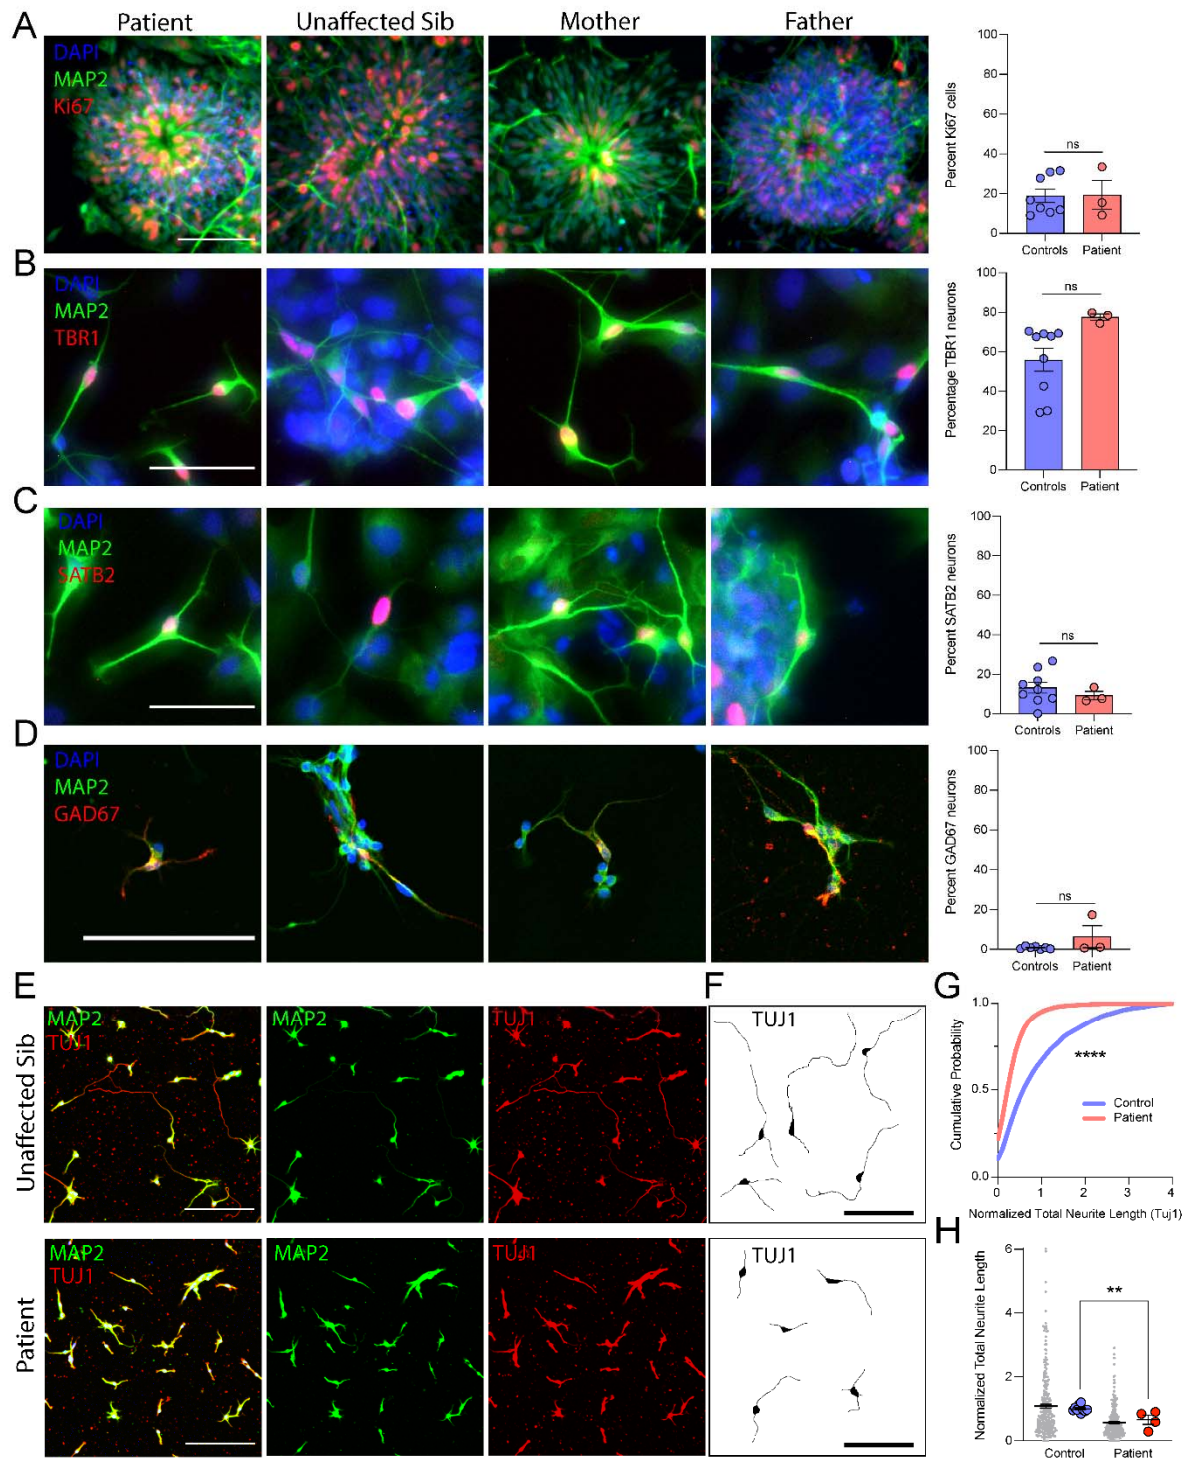

Figure 3

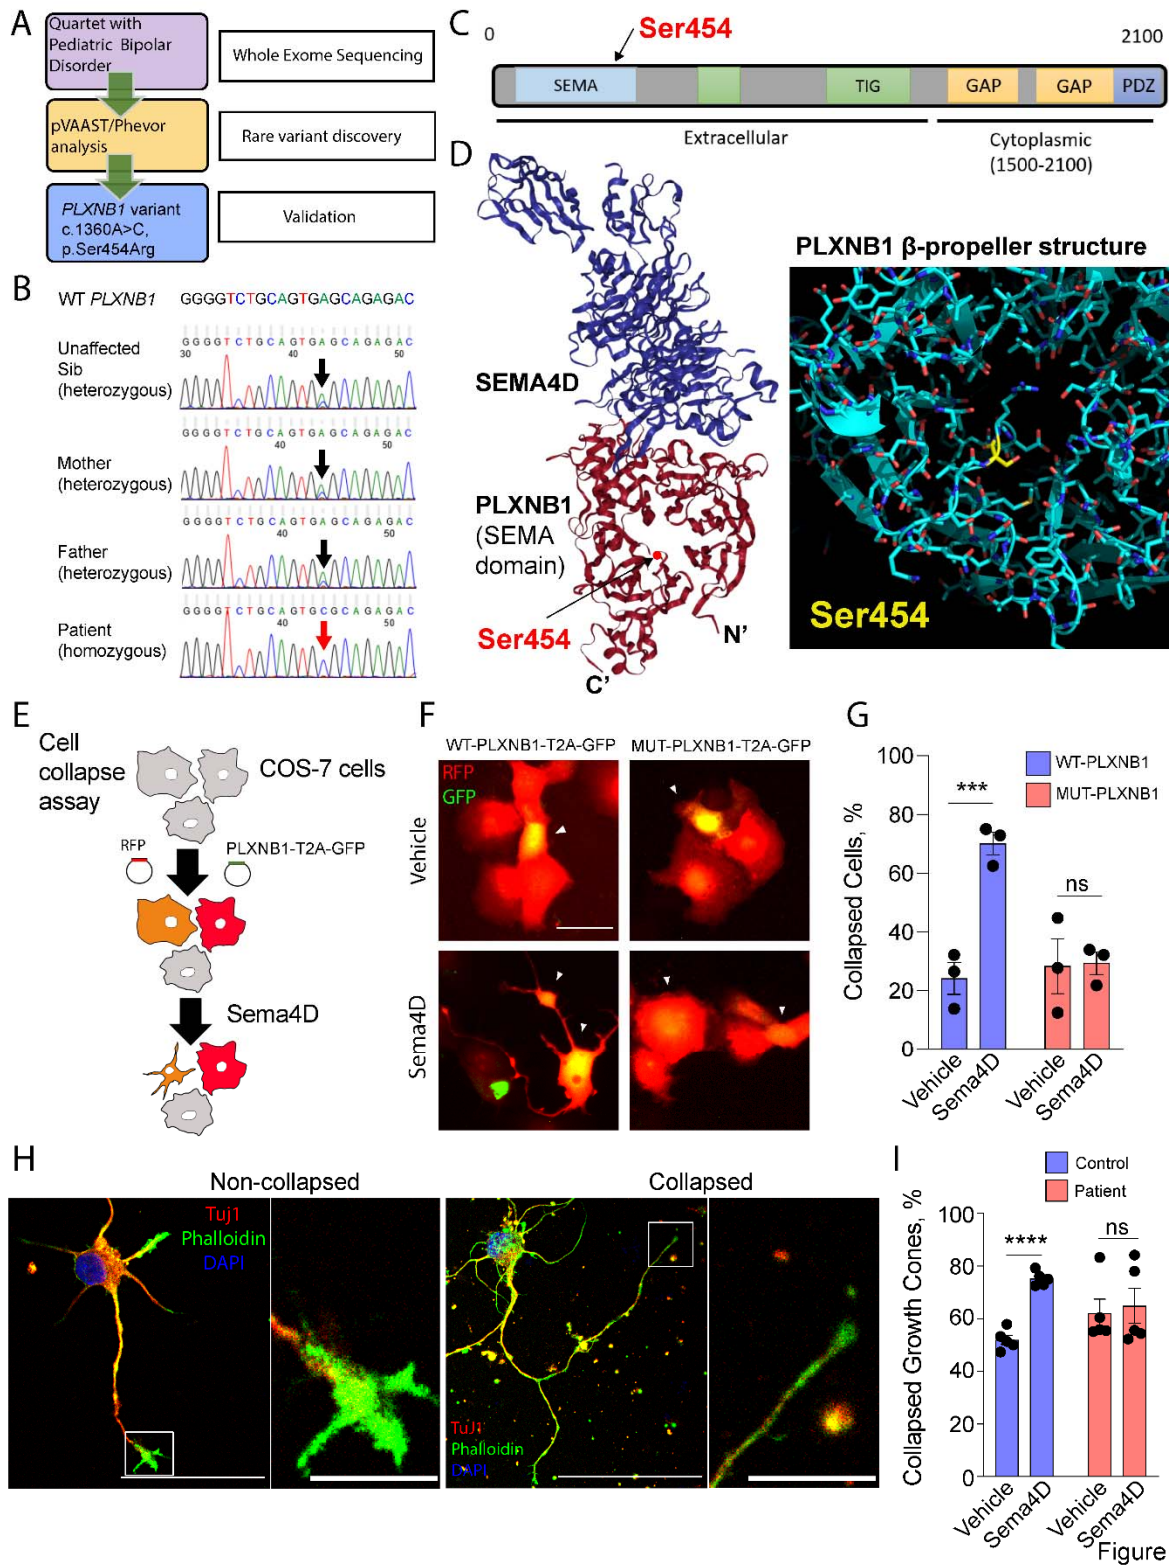

Figure 4

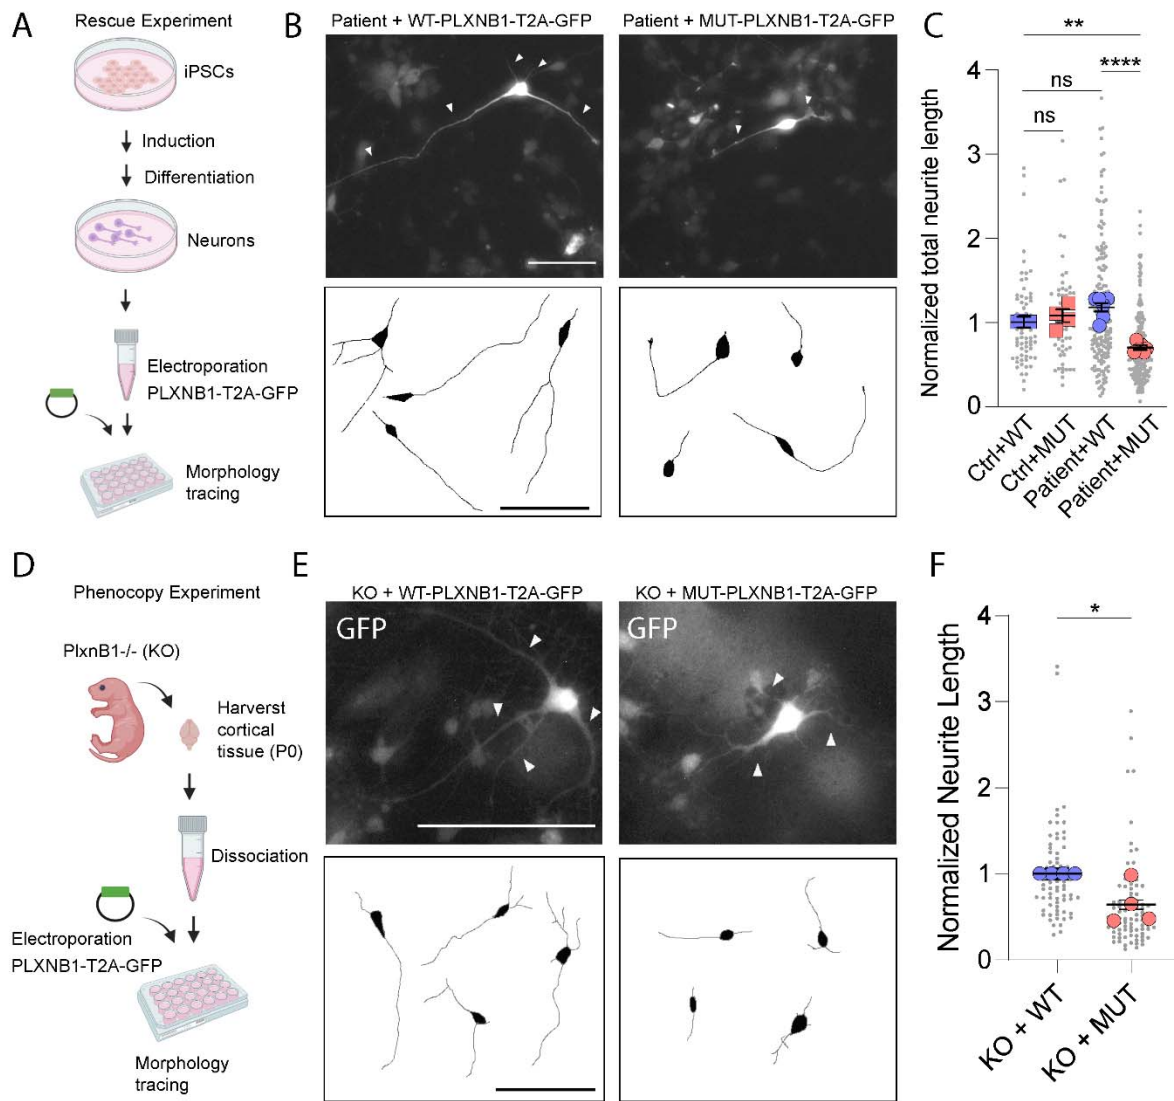

Figure 5
